# Supplementary material
Source: PubMed Central journal article supplement (PMC6434126)
Supplement: IAI.00765-18-s0001.pdf [file IAI.00765-18-s0001.pdf]

**Table S1: Results of qRT-PCR.** Differential gene expression was determined using REST software (1). *adk* and *gatB* (2) were used as reference genes (REF). With this method, the results of the RNA sequencing experiments can be confirmed or refuted on a “yes-or-no” level (UP or DOWN or - not regulated). The differential expression values do not necessarily correlate, as there are fundamental differences between the two methods, regarding e.g. primer design for qRT-PCR or different analysis software (3). TRG = target. C.I. = confidence interval. P(H1) = significance. REST sets maximum primer efficiency = 1.

| Gene        | Type | Efficiency | Expression | Std. Error      | 95% C.I.        | P(H1) | Result |
|-------------|------|------------|------------|-----------------|-----------------|-------|--------|
| <i>adk</i>  | REF  | 0.928      | 1.035      |                 |                 |       |        |
| <i>gatB</i> | REF  | 0.943      | 0.966      |                 |                 |       |        |
| bcf_04565   | TRG  | 0.941      | 26.854     | 20.779 - 39.002 | 18.149 - 45.283 | 0.011 | UP     |
| bcf_04560   | TRG  | 0.989      | 6.729      | 5.189 - 8.544   | 4.698 - 11.681  | 0.01  | UP     |
| bcf_27370   | TRG  | 0.868      | 32.601     | 28.173 - 38.185 | 24.969 - 39.559 | 0.02  | UP     |
| bcf_09850   | TRG  | 0.974      | 9.407      | 7.697 - 11.016  | 7.175 - 12.229  | 0.006 | UP     |
| bcf_16240   | TRG  | 0.985      | 3.619      | 3.057 - 4.100   | 2.864 - 4.287   | 0.006 | UP     |
| bcf_08380   | TRG  | 0.969      | 5.091      | 4.208 - 5.977   | 4.116 - 6.089   | 0.001 | UP     |
| bcf_13835   | TRG  | 1          | 3.605      | 2.534 - 5.347   | 1.949 - 6.600   | 0     | UP     |
| bcf_05660   | TRG  | 0.949      | 2.942      | 2.172 - 4.706   | 1.956 - 5.338   | 0.016 | UP     |
| bcf_17385   | TRG  | 0.998      | 3.313      | 2.928 - 3.662   | 2.741 - 4.193   | 0.006 | UP     |
| bcf_17575   | TRG  | 1          | 1.24       | 0.921 - 1.669   | 0.861 - 1.834   | 0.272 | -      |
| bcf_01910   | TRG  | 1          | 5.766      | 4.376 - 7.379   | 4.153 - 9.144   | 0.024 | UP     |
| bcf_24405   | TRG  | 0.91       | 3.653      | 2.415 - 4.596   | 2.180 - 5.146   | 0.006 | UP     |
| bcf_24230   | TRG  | 0.982      | 1.872      | 1.457 - 2.384   | 1.201 - 2.885   | 0.011 | UP     |
| bcf_17530   | TRG  | 0.76       | 1.399      | 1.198 - 1.623   | 1.063 - 1.752   | 0.015 | UP     |
| bcf_18185   | TRG  | 0.891      | 0.907      | 0.523 - 1.398   | 0.404 - 2.098   | 0.804 | -      |
| bcf_17340   | TRG  | 1          | 2.317      | 2.040 - 2.638   | 1.934 - 2.774   | 0.005 | UP     |
| bcf_15285   | TRG  | 0.883      | 0.807      | 0.603 - 1.055   | 0.523 - 1.212   | 0.235 | -      |
| bcf_00530   | TRG  | 0.925      | 3.021      | 2.429 - 3.748   | 2.214 - 4.081   | 0.017 | UP     |
| bcf_09265   | TRG  | 1          | 1.29       | 1.026 - 1.547   | 1.003 - 1.578   | 0.037 | UP     |
| bcf_08015   | TRG  | 0.809      | 0.68       | 0.539 - 0.946   | 0.514 - 0.994   | 0.051 | -      |
| bcf_03465   | TRG  | 1          | 0.025      | 0.016 - 0.039   | 0.013 - 0.048   | 0.013 | DOWN   |
| bcf_04545   | TRG  | 0.987      | 0.345      | 0.292 - 0.410   | 0.269 - 0.429   | 0.029 | DOWN   |
| bcf_16685   | TRG  | 0.988      | 0.359      | 0.292 - 0.452   | 0.273 - 0.466   | 0.017 | DOWN   |
| bcf_15280   | TRG  | 0.939      | 0.368      | 0.236 - 0.573   | 0.214 - 0.633   | 0.01  | DOWN   |
| bcf_13360   | TRG  | 1          | 0.089      | 0.034 - 0.228   | 0.028 - 0.280   | 0.021 | DOWN   |
| bcf_18650   | TRG  | 0.985      | 0.256      | 0.223 - 0.323   | 0.205 - 0.354   | 0.017 | DOWN   |

1. Pfaffl MW, Horgan GW, Dempfle L. 2002. Relative expression software tool (REST) for group-wise comparison and statistical analysis of relative expression results in real-time PCR. *Nucleic Acids Res* 30:e36.
2. Reiter L, Kolsto AB, Piehler AP. 2011. Reference genes for quantitative, reverse-transcription PCR in *Bacillus cereus* group strains throughout the bacterial life cycle. *J Microbiol Methods* 86:210-7.
3. Dallas PB, Gottardo NG, Firth MJ, Beesley AH, Hoffmann K, Terry PA, Freitas JR, Boag JM, Cummings AJ, Kees UR. 2005. Gene expression levels assessed by oligonucleotide microarray analysis and quantitative real-time RT-PCR -- how well do they correlate? *BMC Genomics* 6:59.
