# Supplementary material
Source: PubMed Central journal article supplement (PMC6434126)
Supplement: IAI.00765-18-s0005.pdf [file IAI.00765-18-s0005.pdf]

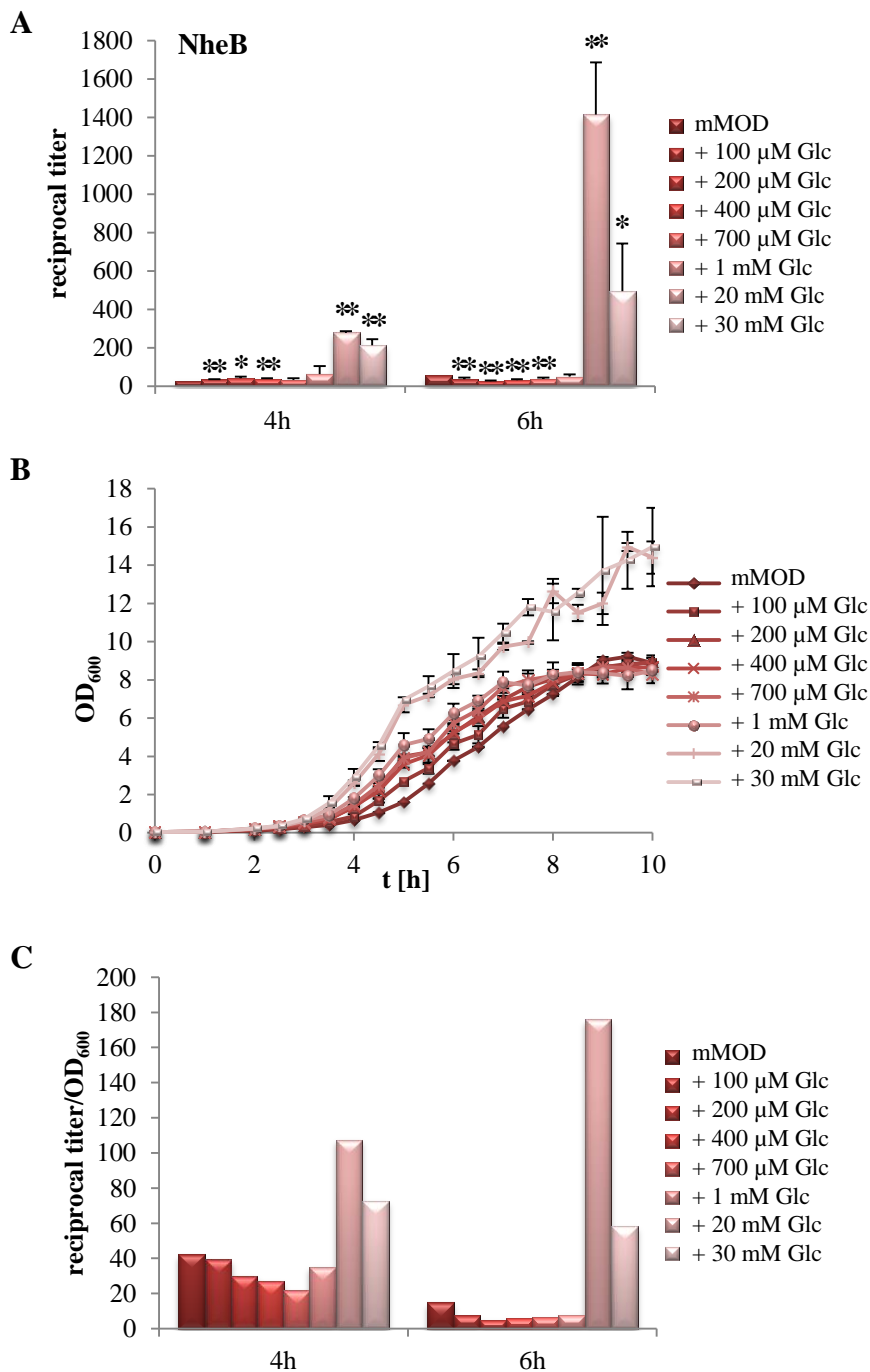

**Fig. S2: Growth and toxin production of *B. cereus* strain F837/76 in mMOD minimal medium with rising concentrations of glucose. A.** Toxin production was determined from culture supernatants after 4 and 6 h using NheB-specific EIAs. Reciprocal titers are shown. \*: significant difference to mMOD with  $p$  value  $\leq 0.05$ . \*\*  $p$  value  $\leq 0.01$ . **B.** Growth as increase of optical density ( $OD_{600}$ ) per time. **C.** NheB productivity was determined as titers per  $OD_{600}$ .
