# Supplementary material
Source: PubMed Central journal article supplement (PMC6434126)
Supplement: IAI.00765-18-s0006.pdf [file IAI.00765-18-s0006.pdf]

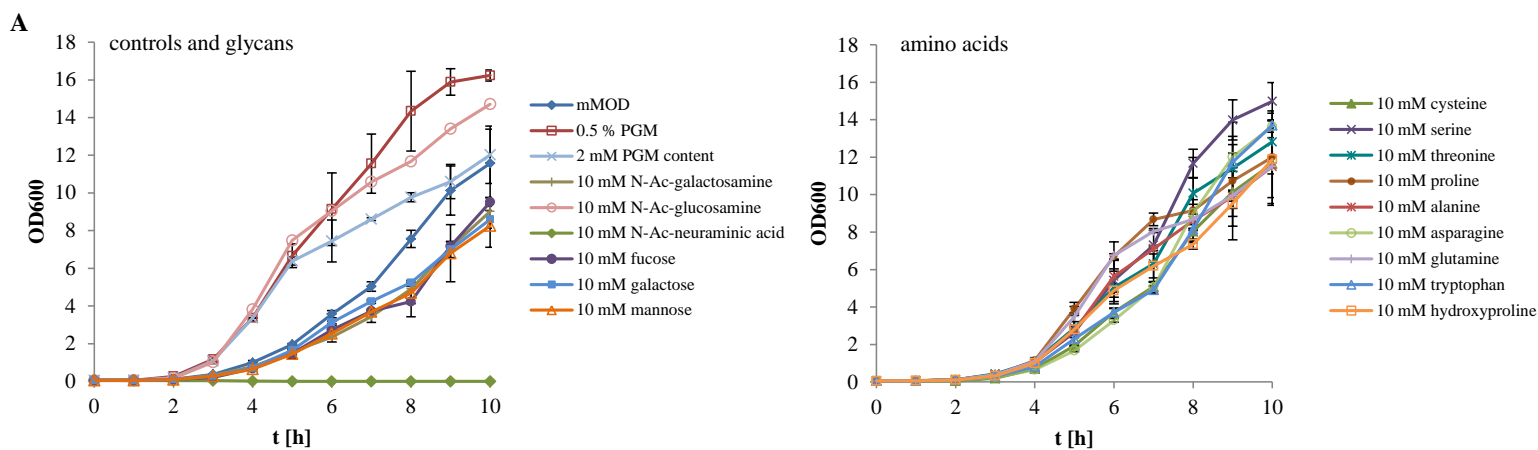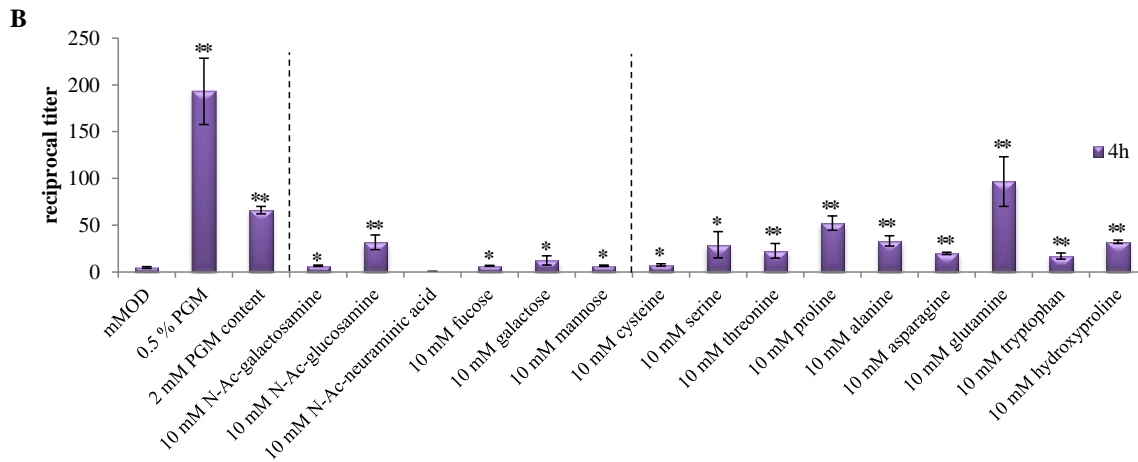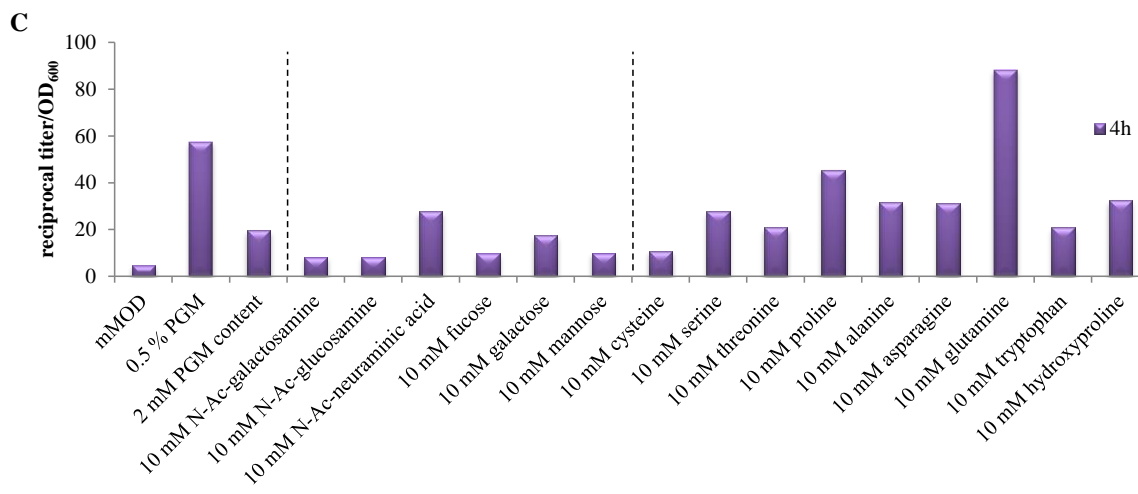

**Fig. S3: Growth and enterotoxin production of emetic *B. cereus* strain F4810/72, grown in mMOD minimal medium supplied with different amino acids and sugars. A. Growth. B. NheB production after 4 h as determined in sandwich EIAs. 0.5 % PGM was used as positive control. \*: significant difference to mMOD with  $p$  value  $\leq 0.05$ . \*\*  $p$  value  $\leq 0.01$ . C. Relative productivity of NheB calculated as reciprocal titer/OD<sub>600</sub>.**
